# Supplementary material
Source: MDPI journal article supplement (https://www.mdpi.com/2220-9964/8/4/175)
Supplement: s1 [file s1]

| Quadratic Function | $Z(x,y) = a + by + cy^2 + dx + exy + fx^2$ |                       |
|--------------------|--------------------------------------------|-----------------------|
| Coef.              | GNSS Z – 50 Z                              | GNSS Z – 25 Z         |
| <i>a</i>           | 1.3670669669806                            | 2.5823708307192       |
| <i>b</i>           | -0.026185366385914                         | -0.051837982442026    |
| <i>c</i>           | 0.00014023392011459                        | 0.00027230250622736   |
| <i>d</i>           | -0.018507294002483                         | -0.03102392812261     |
| <i>e</i>           | -0.000046743215911017                      | -0.000058151858890933 |
| <i>f</i>           | 0.00030256135546863                        | 0.00045397141172566   |
|                    |                                            |                       |
|                    |                                            |                       |

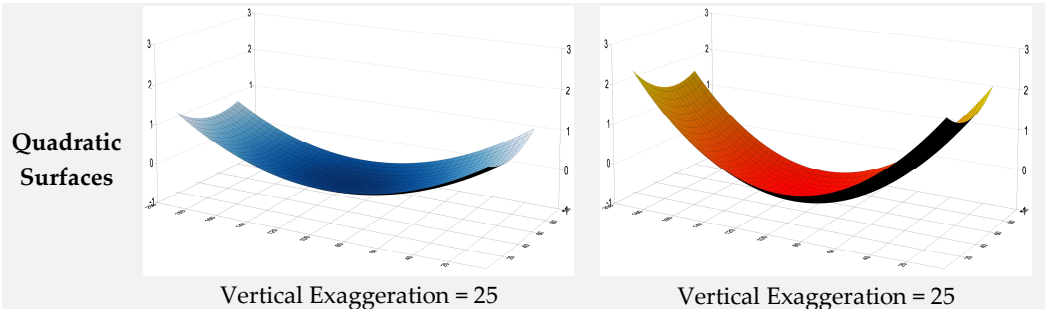

| Cubic Function | $Z(x,y) = a + by + cy^2 + dy^3 + ex + fxy + gxy^2 + hx^2 + ix^2y + jx^3$ |                         |
|----------------|--------------------------------------------------------------------------|-------------------------|
| Coef.          | GNSS Z – 50 Z                                                            | GNSS Z – 25 Z           |
| <i>a</i>       | 1.3305022207641                                                          | 2.4230646529513         |
| <i>b</i>       | -0.025432040863908                                                       | -0.047147287573627      |
| <i>c</i>       | 0.00011618755638084                                                      | 0.00020795014817745     |
| <i>d</i>       | 0.00000011948590231787                                                   | 0.0000002519593922517   |
| <i>e</i>       | -0.014696539844422                                                       | -0.022997967279184      |
| <i>f</i>       | 0.000022711324359495                                                     | -0.000033201786321083   |
| <i>g</i>       | -0.00000027205299177875                                                  | -0.00000022060806245848 |
| <i>h</i>       | 0.000080777480406227                                                     | 0.0001841430950091      |
| <i>i</i>       | -0.00000045295920865605                                                  | 0.000000041370696521365 |
| <i>j</i>       | 0.0000029183884301843                                                    | 0.0000026844385333149   |

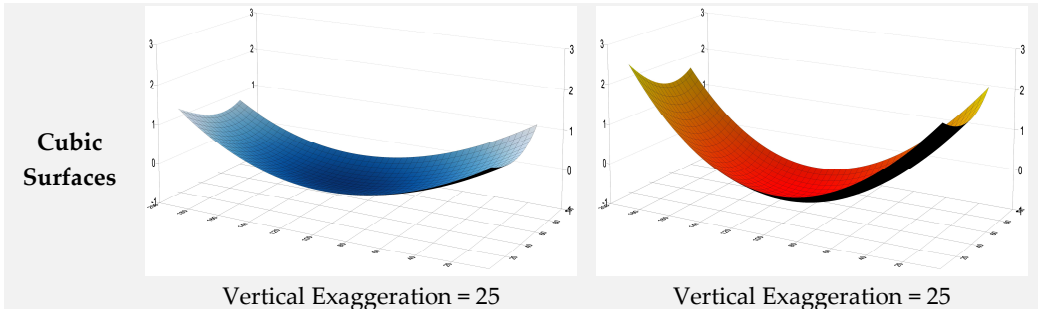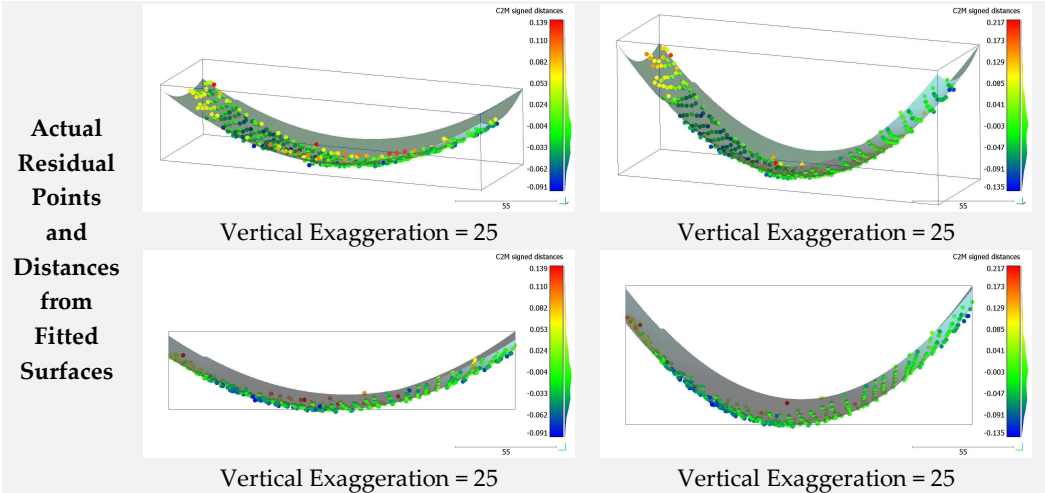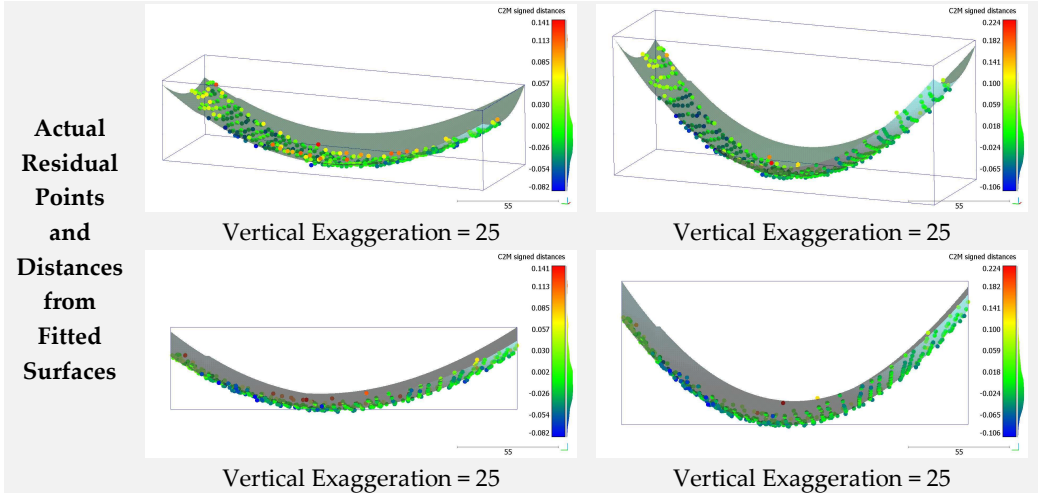

|               |             |             |
|---------------|-------------|-------------|
| Mean Distance | -0.000335 m | -0.000600 m |
|---------------|-------------|-------------|

|               |             |             |
|---------------|-------------|-------------|
| Mean Distance | -0.000250 m | -0.000339 m |
|---------------|-------------|-------------|

|           |            |            |
|-----------|------------|------------|
| Std. Dev. | 0.042534 m | 0.060153 m |
|-----------|------------|------------|

|           |            |            |
|-----------|------------|------------|
| Std. Dev. | 0.039875 m | 0.047647 m |
|-----------|------------|------------|

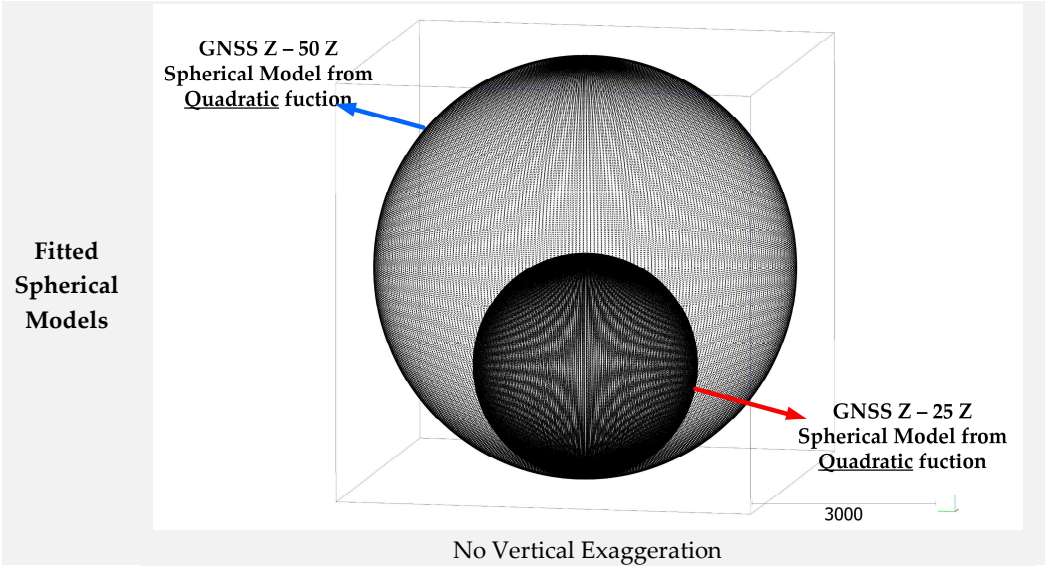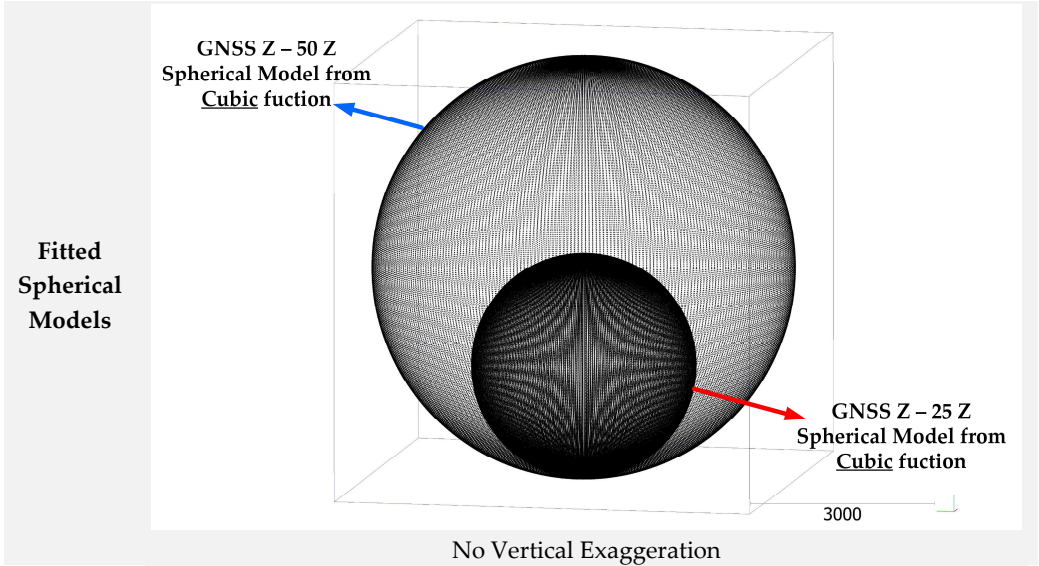

|               |               |               |
|---------------|---------------|---------------|
| Sphere Radius | 3478.919189 m | 1839.071899 m |
|---------------|---------------|---------------|

|               |               |               |
|---------------|---------------|---------------|
| Sphere Radius | 3452.648926 m | 1831.117432 m |
|---------------|---------------|---------------|

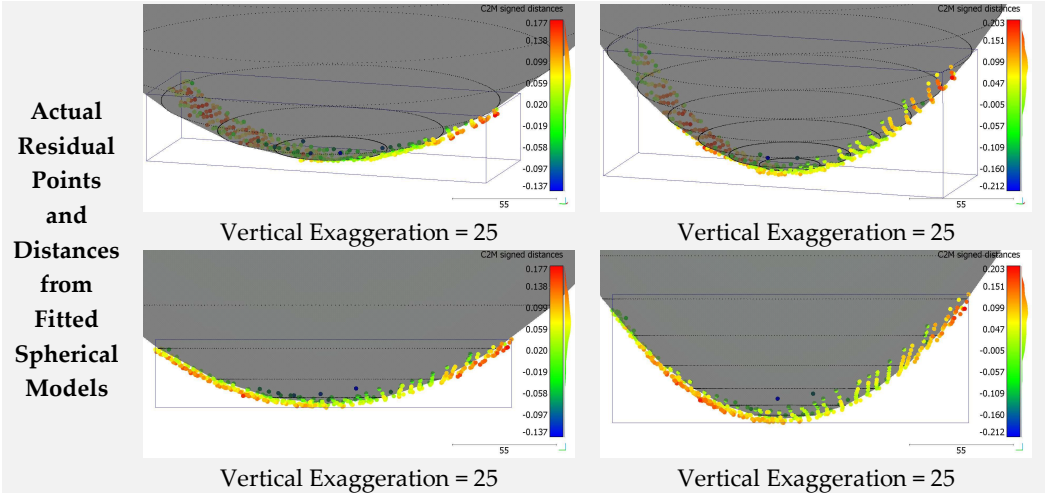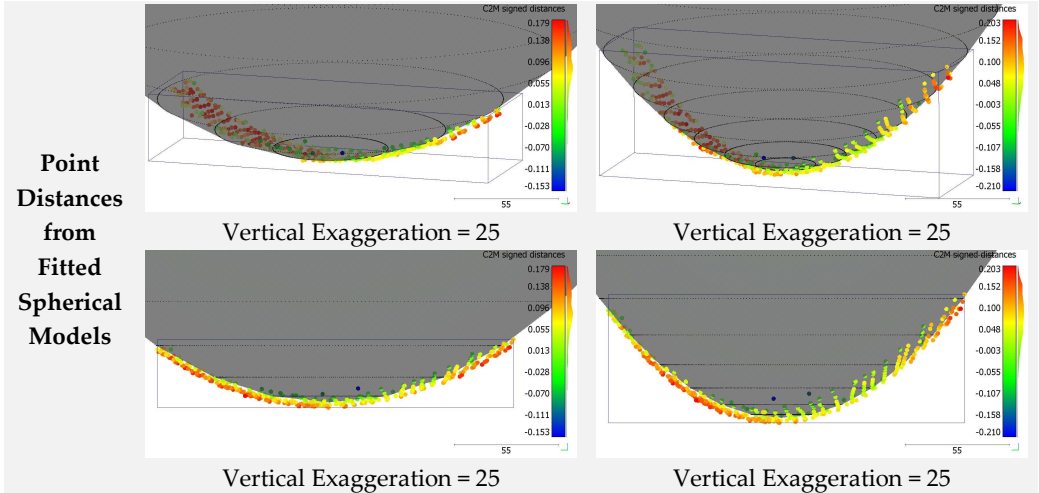

|               |            |            |
|---------------|------------|------------|
| Mean Distance | 0.065584 m | 0.063697 m |
|---------------|------------|------------|

|               |            |            |
|---------------|------------|------------|
| Mean Distance | 0.081322 m | 0.075275 m |
|---------------|------------|------------|

|           |            |            |
|-----------|------------|------------|
| Std. Dev. | 0.048048 m | 0.055516 m |
|-----------|------------|------------|

|           |            |            |
|-----------|------------|------------|
| Std. Dev. | 0.053182 m | 0.059317 m |
|-----------|------------|------------|
