# Supplementary material
Source: MDPI journal article supplement (https://www.mdpi.com/2220-9964/8/4/175)

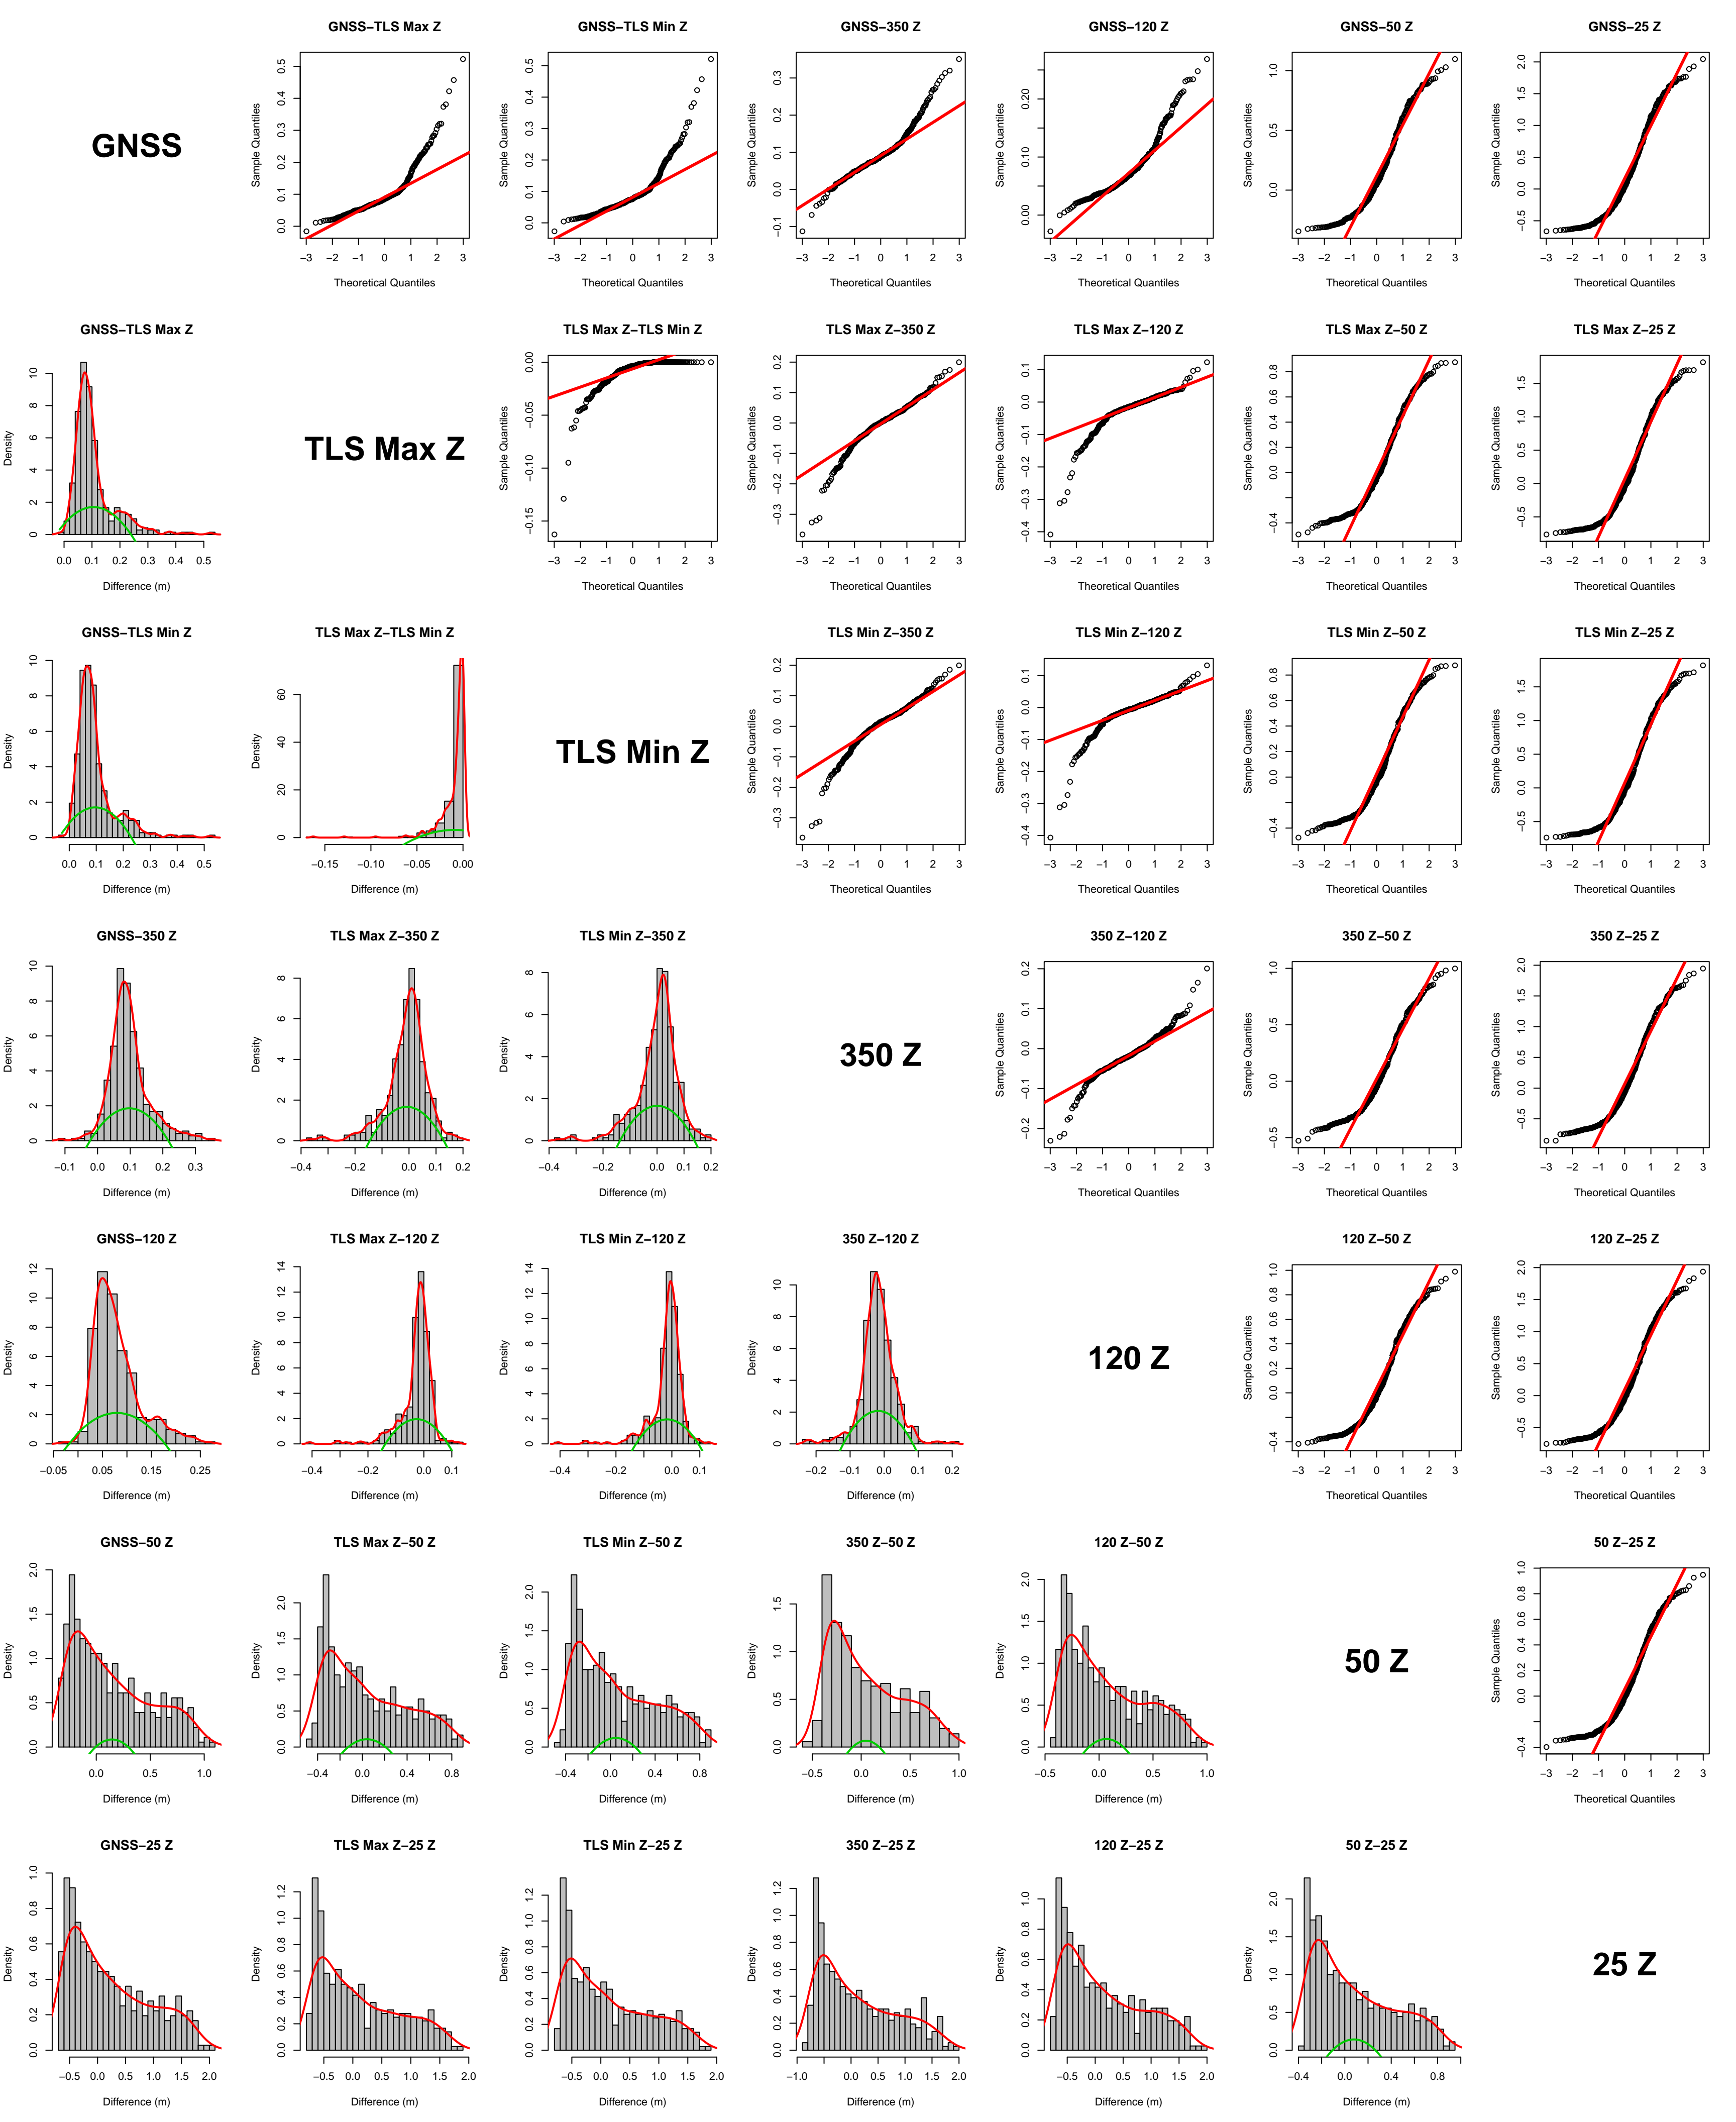

Supplement: s1 [file s1]
